# Supplementary material
Source: publisher figshare collection journal article supplement (https://frontiersin.figshare.com/ndownloader/files/28875354)
Supplement: Supplementary file 1 [file 28875354]

## Sheet: alpha diversity of all samples
Sample/Estimators	sobs	ace	chao	shannon	simpson	shannoneven	simpsoneven	coverage
14_20_1_02	31	0	31	2.77317	0.08411	0.807566	0.38352	1
14_20_1_2	21	0	21	2.70027	0.078449	0.886928	0.607009	1
14_20_2_02	32	32	32	2.70281	0.09179	0.779866	0.340452	1
14_20_2_2	24	24	24	2.6957	0.082568	0.848225	0.504632	1
14_20_3_02	29	0	29	2.74642	0.085544	0.815615	0.4031	1
14_20_3_2	23	23	23	2.63312	0.090092	0.839778	0.482597	1
14_25_1_02	29	29	29	2.719	0.088674	0.807473	0.388873	1
14_25_1_2	26	26.328	26	2.48801	0.104172	0.763638	0.369212	0.999831
14_25_2_02	35	35	35	2.81704	0.08387	0.792339	0.340662	1
14_25_2_2	26	26	26	2.81796	0.071866	0.86491	0.535183	1
14_25_3_02	26	26	26	2.69232	0.088478	0.826348	0.434702	1
14_25_3_2	27	27	27	2.54519	0.101613	0.772245	0.364491	1
14_30_1_02	34	0	34	2.93615	0.073619	0.83263	0.399514	1
14_30_1_2	37	37	37	3.23058	0.049717	0.894669	0.543615	1
14_30_2_02	41	41	41	3.17958	0.059693	0.856205	0.408592	1
14_30_2_2	29	29	29	3.10321	0.051735	0.921573	0.666524	1
14_30_3_02	43	0	43	3.4196	0.042635	0.909178	0.54546	1
14_30_3_2	20	20	20	2.75258	0.071164	0.918834	0.702607	1
4_20_1_02	26	26.5339	26	2.14207	0.144576	0.657461	0.26603	0.999831
4_20_1_2	27	31.4531	30	2.43607	0.112572	0.739136	0.329009	0.999494
4_20_2_02	26	26	26	2.22951	0.133822	0.6843	0.287408	1
4_20_2_2	26	26	26	2.62178	0.093003	0.804696	0.41355	1
4_20_3_02	24	24	24	2.29082	0.129607	0.720826	0.321484	1
4_20_3_2	22	0	22	2.4829	0.105597	0.803258	0.430453	1
4_25_1_0_2	25	26.1295	26	2.39206	0.111914	0.743134	0.357417	0.999663
4_25_1_2	22	0	22	2.19814	0.155183	0.711132	0.292909	1
4_25_2_02	25	26.4032	25	2.34141	0.11995	0.7274	0.333472	0.999831
4_25_2_2	34	34	34	2.64871	0.09159	0.751117	0.321125	1
4_25_3_02	25	25	25	2.24346	0.13358	0.696971	0.299446	1
4_25_3_2	27	27.6431	27	2.46117	0.1092	0.746753	0.339168	0.999831
4_30_1_02	21	21	21	2.34618	0.115699	0.770622	0.411575	1
4_30_1_2	22	0	22	2.15567	0.144826	0.697394	0.313856	0.999831
4_30_2_02	44	44.705	44.3333	2.39834	0.121765	0.633779	0.186648	0.999663
4_30_2_2	35	35	35	2.66562	0.102022	0.749748	0.280051	1
4_30_3_02	28	28	28	2.45739	0.111859	0.737467	0.319278	1
8_20_1_02	24	24	24	2.28162	0.1264	0.717929	0.329641	1
8_20_1_2	16	0	16	2.23698	0.124687	0.806819	0.501254	1
8_20_2_02	17	17	17	2.12743	0.140128	0.75089	0.419784	1
8_20_2_2	25	0	25	2.57443	0.099618	0.799793	0.401534	1
8_20_3_02	19	20.1111	19	2.16463	0.137866	0.735159	0.38176	0.999831
8_20_3_2	32	32	32	2.47974	0.116841	0.715501	0.267456	1
8_25_1_02	19	19	19	2.43674	0.104314	0.827572	0.504551	1
8_25_1_2	38	38	38	2.83667	0.077888	0.779822	0.337867	1
8_25_2_02	25	0	25	2.71519	0.085044	0.843522	0.470342	1
8_25_2_2	19	19	19	2.43905	0.103178	0.828359	0.510104	1
8_25_3_02	22	22	22	2.57903	0.093917	0.834356	0.483986	1
8_25_3_2	22	0	22	2.45528	0.111438	0.794322	0.407892	1
8_30_1_02	26	26	26	2.77164	0.078658	0.850694	0.48897	1
8_30_1_2	22	23	22	2.42489	0.113204	0.784489	0.401529	0.999831
8_30_2_02	25	25	25	2.66077	0.089619	0.826616	0.446332	1
8_30_2_2	41	41.25	41	2.57731	0.111847	0.694024	0.218068	0.999831
8_30_3_02	29	29	29	2.77123	0.083173	0.822984	0.41459	1
8_30_3_2	30	30	30	2.59652	0.103317	0.763413	0.32263	1

## Sheet: Temperature
estimators	T20-mean	T20-sd	T25-mean	T25-sd	T30-mean	T30-sd	statistic	pvalue	qvalue	Pvalue(T20-T30)	Pvalue(T20-T25)	Pvalue(T25-T30)
chao	24.83	4.793	26.28	5.131	31.02	8.081	5.4616	0.06517	0.1738	< 0.05	>= 0.1	< 0.1
sobs	24.67	4.653	26.22	5.14	31	8.047	5.88853	0.05264	0.1738	< 0.01	>= 0.1	< 0.1
ace	17.01	12.92	22.58	11.47	25.29	14	4.25836	0.1189	0.1903	>= 0.1	>= 0.1	>= 0.1
shannon	2.462	0.2282	2.546	0.1946	2.732	0.3463	5.54062	0.06264	0.1738	< 0.05	>= 0.1	>= 0.1
coverage	1	0.0001269	1	9.692E-5	1	9.917E-5	0.225117	0.8935	0.9106	>= 0.1	>= 0.1	>= 0.1
shannoneven	0.773	0.06101	0.784	0.04839	0.8038	0.08509	1.77846	0.411	0.548	>= 0.1	>= 0.1	>= 0.1
simpsoneven	0.3928	0.09074	0.394	0.07723	0.4159	0.1422	0.187391	0.9106	0.9106	>= 0.1	>= 0.1	>= 0.1
simpson	0.1098	0.0224	0.102	0.02035	0.08968	0.02909	4.46515	0.1073	0.1903	< 0.05	>= 0.1	>= 0.1

## Sheet: Day
estimators	F_02-mean	F_02-sd	F_2-mean	F_2-sd	Pvalue(F_02-F_2)	Qvalue(F_02-F_2)
chao	27.8272	6.87518	26.7692	6.33282	0.6109	0.7813
sobs	27.7778	6.85752	26.6538	6.29884	0.5862	0.7813
ace	21.9586	12.1987	21.1413	14.0888	0.7813	0.7813
shannon	2.56799	0.319076	2.58683	0.241649	0.7691	0.7813
coverage	0.999956	0.000100223	0.999948	0.000114654	0.7434	0.7813
shannoneven	0.778107	0.067141	0.795407	0.0651885	0.5631	0.7813
simpsoneven	0.383985	0.0801861	0.417859	0.124636	0.5631	0.7813
simpson	0.102233	0.0262601	0.0991303	0.0242065	0.6246	0.7813

## Sheet: Fraction
estimators	Day14-mean	Day14-sd	Day4-mean	Day4-sd	Day8-mean	Day8-sd	statistic	pvalue	qvalue	Pvalue(Day14-Day4)	Pvalue(Day4-Day8)	Pvalue(Day14-Day8)
chao	29.61	6.455	27.25	5.886	25.06	6.847	5.67607	0.05854	0.0669	>= 0.1	>= 0.1	< 0.1
sobs	29.61	6.455	27	5.799	25.06	6.847	5.76512	0.05599	0.0669	>= 0.1	>= 0.1	< 0.1
ace	20.85	14.21	23.64	12.49	20.3	12.83	1.36994	0.5041	0.5041	>= 0.1	>= 0.1	>= 0.1
shannon	2.831	0.2487	2.383	0.1641	2.507	0.209	25.7898	2.511E-6	6.696E-6	< 0.001	>= 0.1	< 0.001
coverage	1	3.983E-5	0.9999	0.0001571	1	6.481E-5	7.57158	0.02269	0.03631	< 0.05	< 0.05	>= 0.1
shannoneven	0.841	0.05031	0.728	0.04553	0.7876	0.04817	25.9814	2.281E-6	6.696E-6	< 0.001	< 0.01	< 0.01
simpsoneven	0.4678	0.1115	0.3237	0.059	0.406	0.08443	18.2506	0.0001089	0.0002178	< 0.001	< 0.05	< 0.1
simpson	0.07777	0.01737	0.1198	0.01823	0.1056	0.01902	27.4964	1.07E-6	6.696E-6	< 0.001	< 0.1	< 0.001
